# Supplementary material for: Transcriptomic Interaction between Young Fecal Transplantation and Perfluorobutanesulfonate in Aged Zebrafish Gonads
Source: MDPI journal article supplement (doi:10.3390/toxics10110631), 2022-10-22
Supplement: s1 [file s1]

# Supplementary Materials: Transcriptomic Interaction between Young Fecal Transplantation and Perfluorobutanesulfonate in Aged Zebrafish Gonads

Lizhu Tang, Jing Li, Baili Sun, Yachen Bai, Xiangzhen Zhou and Lianguo Chen

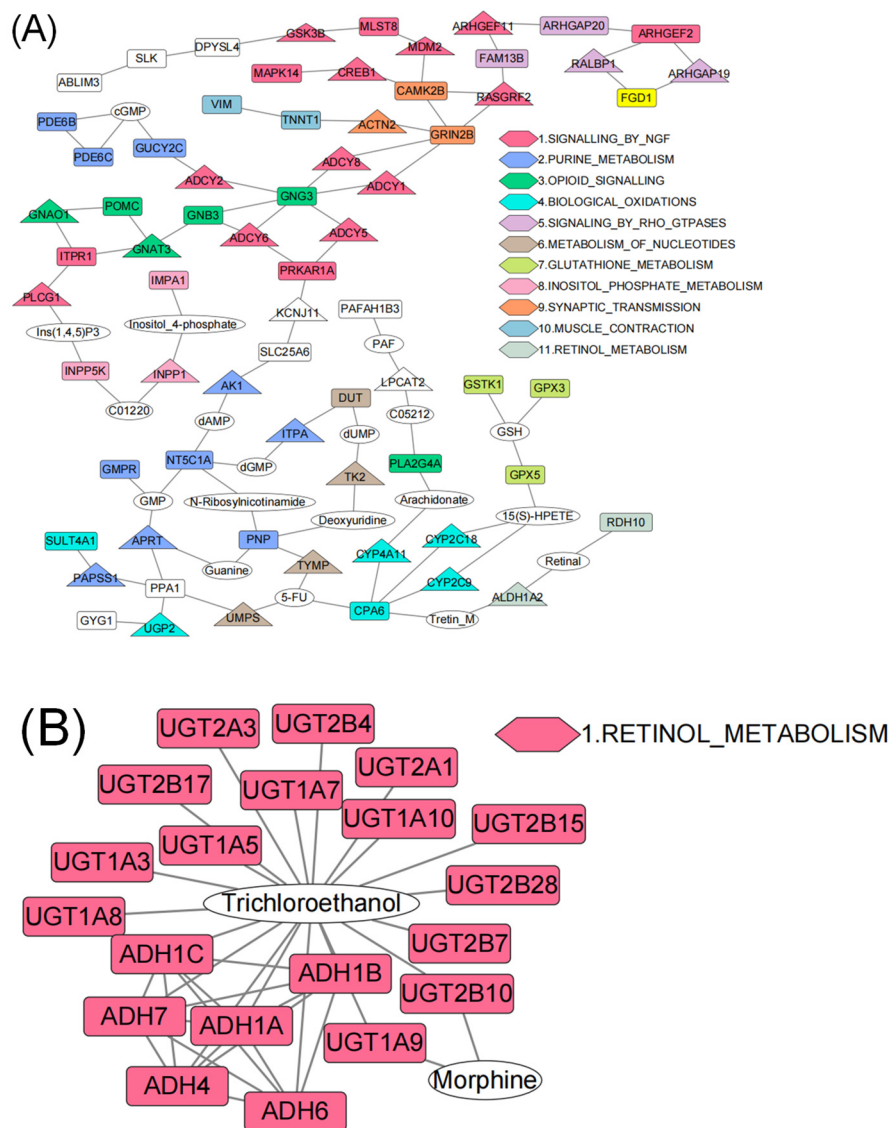

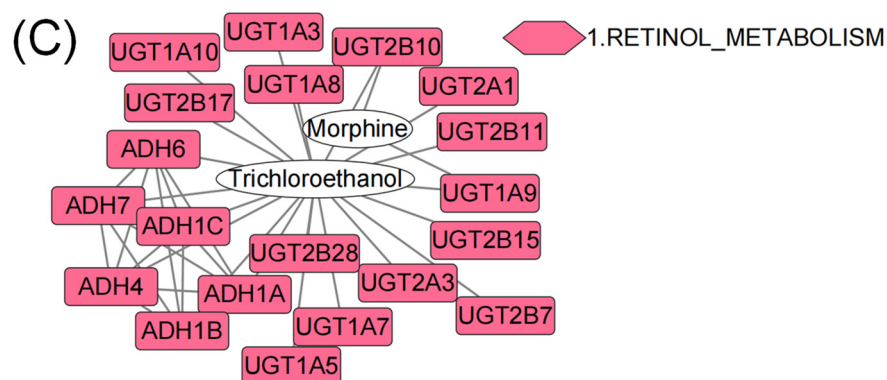

**Figure S1.** The most significant gene interactive network for young (A) and aged feces (B) groups in males, and aged feces group in females (C) based on R spider enrichment of differential genes. The colored node is labeled by the human homologs of differential genes, where the same color represented enrichment into the same pathway. Only overrepresented pathways are colored. The number preceding the pathway denotes the hierarchy order.

**Table S1.** Primers of the selected genes for qRT-PCR assay.

| Genes          | Sequence of primers (5'–3')                            | Reference          | Accession number | Amplification efficiency |
|----------------|--------------------------------------------------------|--------------------|------------------|--------------------------|
| <i>acvr2ab</i> | F: CCATGAGAAGGGTTCACGAC<br>R: TAGATCACTCTTCAGCAGCAC    | Dogra et al., 2017 | XM_005168700.4   | 99.2%                    |
| <i>igf3</i>    | F: GCCAAACGCCTTCAGATAATGC<br>R: GCTGCTCCAGGTTTGCCTATGT | Li et al., 2018    | NM_001115050.1   | 99.0%                    |
| <i>inhbaa</i>  | F: TGCTGCAAGCGACAATTTTA<br>R: CATTGCTTCGGGACTCAAG      | Wang and Ge, 2004  | NM_001362254.1   | 93.9%                    |
| <i>insb</i>    | F: CCTGGAGACCTTGCTGGCTT<br>R: CCAGGTGGTAGATGGTGCAGG    | Lou et al., 2020   | NM_001039064.1   | 93.2%                    |
| <i>ptgs2a</i>  | F: TTATGGAGAGACGCTGGAGGT<br>R: GATGAGACGAGTGGTTTGGA    | Tang et al., 2016  | NM_153657.1      | 99.3%                    |
| <i>rpl8</i>    | F: TTGTTGGTGTGTTGCTGGT<br>R: GGATGCTCAACAGGGTTCAT      | Chen et al., 2012  | NM_200713.1      | 99.6%                    |

## References

- Chen, L.; Yu, K.; Huang, C.; Yu, L.; Zhu, B.; Lam, P.K.S.; Lam, J.C.W.; Zhou, B. Prenatal Transfer of Polybrominated Diphenyl Ethers (PBDEs) Results in Developmental Neurotoxicity in Zebrafish Larvae. *Environ. Sci. Technol.* **2012**, *46*, 9727–9734. <https://doi.org/10.1021/es302119g>.
- Dogra, D.; Ahuja, S.; Kim, H.; Rasouli, S.; Stainier, D.; Reischauer, S. Opposite Effects of Activin Type 2 Receptor Ligands on Cardiomyocyte Proliferation during Development and Repair. *Nat. Commun.* **2017**, *8*, 1902. <https://doi.org/10.1038/s41467-017-01950-1>.
- Li, J.; Niu, C.; Cheng, C. Igf3 Serves as A Mediator of Luteinizing Hormone in Zebrafish Ovulation. *Biol. Reprod.* **2018**, *6*, 99. <https://doi.org/10.1093/biolre/iory143>.
- Lou, B.; Boger, M.; Bennewitz, K.; Sticht, C.; Kopf, S.; Morgenstern, J.; Fleming, T.; Hell, R.; Yuan, Z.; Nawroth, P.; Kroll, J. Elevated 4-Hydroxynonenal Induces Hyperglycaemia via Aldh3a1 Loss in Zebrafish and Associates with Diabetes Progression in Humans. *Redox Biol.* **2020**, *37*, 101723. <https://doi.org/10.1016/j.redox.2020.101723>.
- Tang, H.; Liu, Y.; Li, J.; Yin, Y.; Li, G.; Chen, Y.; Li, S.; Zhang, Y.; Lin, H.; Liu, X.; Cheng, C.H.K. Gene Knockout of Nuclear Progesterone Receptor Provides Insights into the Regulation of Ovulation by LH Signaling in Zebrafish. *Sci. Rep.* **2016**, *6*, 28545. <https://doi.org/10.1038/srep28545>.
- Wang, Y.; Ge, W. Developmental Profiles of Activin  $\beta$ A,  $\beta$ B, and Follistatin Expression in the Zebrafish Ovary: Evidence for Their Differential Roles during Sexual Maturation and Ovulatory Cycle. *Biol. Reprod.* **2004**, *71*, 6. <https://doi.org/10.1095/biolreprod.104.032649>.

**Table S2.** Summary of transcriptomic sequencing data and quality in **male** zebrafish.

| Samples         | Raw Base (G) | Clean Base (G) | Raw Reads  | Clean Reads | Effective Rate (%) | Error Rate (%) | Q20 (%) | Q30 (%) | GC Content (%) |
|-----------------|--------------|----------------|------------|-------------|--------------------|----------------|---------|---------|----------------|
| Young-1         | 6.34         | 5.88           | 42,265,414 | 39,226,198  | 92.81              | 0.03           | 97.48   | 93.44   | 42.79          |
| Young-2         | 6.82         | 6.42           | 45,442,946 | 42,804,876  | 94.19              | 0.03           | 97.54   | 93.58   | 44.29          |
| Young-3         | 6.64         | 6.29           | 44,244,646 | 41,906,240  | 94.71              | 0.03           | 97.59   | 93.63   | 44.82          |
| Aged Control-1  | 6.6          | 6.31           | 44,005,202 | 42,060,958  | 95.58              | 0.03           | 97.69   | 93.69   | 40.54          |
| Aged Control-2  | 6.47         | 6.17           | 43,163,778 | 41,140,732  | 95.31              | 0.03           | 97.82   | 94.09   | 45.21          |
| Aged Control-3  | 7.27         | 6.63           | 48,443,266 | 44,187,158  | 91.21              | 0.03           | 97.67   | 93.85   | 44.62          |
| Aged Feces-1    | 6.83         | 6.42           | 45,512,514 | 42,790,570  | 94.02              | 0.03           | 97.62   | 93.64   | 41.42          |
| Aged Feces-2    | 6.79         | 6.48           | 45,257,058 | 43,175,266  | 95.40              | 0.03           | 97.78   | 94.05   | 43.3           |
| Aged Feces-3    | 6.42         | 6.05           | 42,825,706 | 40,334,516  | 94.18              | 0.03           | 97.71   | 93.9    | 44.82          |
| Aged PFBS-1     | 6.88         | 6.24           | 45,840,308 | 41,587,194  | 90.72              | 0.03           | 97.57   | 93.63   | 42.06          |
| Aged PFBS-2     | 6.89         | 6.44           | 45,902,918 | 42,931,564  | 93.53              | 0.02           | 98.05   | 94.62   | 44.68          |
| Aged PFBS-3     | 6.85         | 6.67           | 45,675,528 | 44,460,020  | 97.34              | 0.03           | 97.74   | 93.73   | 43.82          |
| Aged Combined-1 | 6.53         | 6.27           | 43,520,560 | 41,771,464  | 95.98              | 0.02           | 97.97   | 94.39   | 45.53          |
| Aged Combined-2 | 6.65         | 6.37           | 44,316,666 | 42,477,396  | 95.85              | 0.03           | 97.82   | 94.07   | 45.24          |
| Aged Combined-3 | 6.96         | 6.44           | 46,410,074 | 42,945,688  | 92.54              | 0.03           | 97.32   | 93.02   | 40.31          |

**Table S3.** Summary of transcriptomic sequencing data and quality in **female** zebrafish.

| Samples         | Raw Base (G) | Clean Base (G) | Raw Reads  | Clean Reads | Effective Rate (%) | Error Rate (%) | Q20 (%) | Q30 (%) | GC Content (%) |
|-----------------|--------------|----------------|------------|-------------|--------------------|----------------|---------|---------|----------------|
| Young-1         | 6.92         | 6.48           | 46,158,320 | 43,180,034  | 93.55              | 0.03           | 97.88   | 94.2    | 43.86          |
| Young-2         | 6.51         | 5.96           | 43,369,826 | 39,755,112  | 91.67              | 0.03           | 97.91   | 94.26   | 43.16          |
| Young-3         | 6.51         | 6.09           | 43,369,924 | 40,592,200  | 93.60              | 0.02           | 97.95   | 94.32   | 43.36          |
| Aged Control-1  | 6.87         | 6.52           | 45,776,318 | 43,481,124  | 94.99              | 0.03           | 97.82   | 94.03   | 41.14          |
| Aged Control-2  | 6.52         | 6.52           | 43,490,330 | 43,450,030  | 99.91              | 0.03           | 97.65   | 93.74   | 39.36          |
| Aged Control-3  | 7.33         | 6.89           | 48,887,766 | 45,958,740  | 94.01              | 0.03           | 97.7    | 93.84   | 46.07          |
| Aged Feces-1    | 6.52         | 6.01           | 43,452,702 | 40,083,762  | 92.25              | 0.02           | 97.95   | 94.3    | 43.45          |
| Aged Feces-2    | 6.85         | 6.24           | 45,686,756 | 41,619,012  | 91.10              | 0.03           | 97.8    | 93.98   | 44.11          |
| Aged Feces-3    | 6.83         | 6.38           | 45,509,290 | 42,537,478  | 93.47              | 0.03           | 97.79   | 93.95   | 42.35          |
| Aged PFBS-1     | 6.89         | 6.44           | 45,966,090 | 42,930,132  | 93.40              | 0.03           | 97.78   | 93.92   | 42.96          |
| Aged PFBS-2     | 6.38         | 5.95           | 42,551,228 | 39,634,662  | 93.15              | 0.03           | 97.75   | 93.92   | 42.32          |
| Aged PFBS-3     | 5.85         | 5.84           | 38,996,610 | 38,960,592  | 99.91              | 0.03           | 97.62   | 93.63   | 38.85          |
| Aged Combined-1 | 6.19         | 5.73           | 41,279,416 | 38,185,882  | 92.51              | 0.03           | 97.81   | 93.99   | 43.34          |
| Aged Combined-2 | 6.63         | 6.23           | 44,203,544 | 41,540,026  | 93.97              | 0.03           | 97.66   | 93.58   | 41.8           |
| Aged Combined-3 | 6.92         | 6.55           | 46,128,370 | 43,668,114  | 94.67              | 0.03           | 97.75   | 93.81   | 41.86          |

**Table S4.** The qRT-PCR results of differential genes of aged zebrafish after exposure to PFBS (0 and 100 µg/L) with or without young zebrafish feces.<sup>a</sup>

| Genes  |                | Young        | Aged      |           |           |           |
|--------|----------------|--------------|-----------|-----------|-----------|-----------|
|        |                |              | Control   | Feces     | PFBS      | Combined  |
| Male   | <i>acvr2ab</i> | 2.8±0.89     | 1.02±0.27 | 6.41±1.44 | 4.3±0.40  | 2.94±0.12 |
|        | <i>igf3</i>    | 1.36±0.60    | 1.17±0.82 | 0.49±0.28 | 0.57±0.37 | 0.62±0.32 |
|        | <i>inhbaa</i>  | 0.63±0.20    | 1±0.10    | 0.69±0.33 | 0.68±0.27 | 0.59±0.23 |
|        | <i>insb</i>    | 0.81±0.17    | 1.09±0.53 | 1.82±1.36 | 1.55±0.34 | 0.64±0.35 |
|        | <i>ptgs2α</i>  | 2.71±0.42    | 1.04±0.41 | 2.69±2.01 | 1.15±0.55 | 0.54±0.26 |
| Female | <i>acvr2ab</i> | 0.61±0.33    | 1.03±0.27 | 1.44±0.98 | 1.05±0.13 | 2.07±0.59 |
|        | <i>igf3</i>    | 2.09±0.63    | 1.01±0.19 | 2.61±0.94 | 2.88±0.71 | 1.95±0.69 |
|        | <i>inhbaa</i>  | 2.76±1.97    | 1.04±0.33 | 3.79±1.59 | 2.51±0.36 | 2.48±1.16 |
|        | <i>insb</i>    | 0.21±0.06*** | 1.05±0.43 | 0.74±0.15 | 0.97±0.14 | 0.81±0.06 |
|        | <i>ptgs2α</i>  | 0.3±0.04     | 1.13±0.73 | 1.46±1.04 | 0.23±0.06 | 7.67±2.69 |

<sup>a</sup> Values represent the mean ± SD of three replicates ( $n = 3$ ); \*\*\* $P < 0.001$  indicates significant differences compared to the aged control group.
